# Supplementary material for: Changes of blood pressure following initiation of physical inactivity and after external addition of pulses to circulation
Source: Springer Nature journal article supplement (doi:10.1007/s00421-018-4016-7), 2018-10-22
Supplement: MOESM1 [file 16216970]

## ***Supplemental Data File***

# **Changes of blood pressure following initiation of physical inactivity and after external addition of pulses to circulation**

Marvin A Sackner<sup>1¶</sup>, Shivam Patel<sup>2¶</sup>, Jose A. Adams<sup>3\*</sup>¶

1 Emeritus Director of Medical Services, Mt Sinai Medical Center of Greater Miami, Miami Beach, Florida, United States of America

2 Student, University of Miami, Coral Gables, Florida, United States of America

3 Chief, Division Neonatology Mt Sinai Medical Center of Greater Miami, Miami Beach, Florida, United States of America

\*Corresponding author

E-mail:Tony.Adams@msmc.com

¶ These authors contributed equally to the work

Short Title: Blood Pressure During Physical Inactivity

**Table S1****Mean Difference from SHAM in the Change from Baseline of Systolic and Diastolic Blood Pressure.**

*Legend:* Data represents the mean difference between the Jogging Device (JD) and SHAM (SHAM-JD) for the mean change from baseline and its corresponding 95% Confidence Intervals for systolic and diastolic blood pressures in both seated and supine postures, at various time points. , JD, 5, 10, 15, 20, 25, 30, (5 min epochs), initial 5 min of recovery (REC 5) and end of study (END).

|               | <b>Condition</b> | <b>BP<sub>Syst</sub> (mmHg)</b> | <b>BP<sub>Diast</sub>(mmHg)</b> |
|---------------|------------------|---------------------------------|---------------------------------|
| <b>SUPINE</b> |                  |                                 |                                 |
|               | <b>JD 5</b>      | 2.5(-8.4,13.5)                  | 3.1(-3.1,9.3)                   |
|               | <b>JD 10</b>     | 15.1(15.0,15.3)                 | 17.1(17.0,17,2)                 |
|               | <b>JD 15</b>     | 16.7(16.3,17.0)                 | 19.8(19.6,20.1)                 |
|               | <b>JD 20</b>     | 15.4(14,16.8)                   | 18.1(17.3,19.0)                 |
|               | <b>JD 25</b>     | 19.9(18.7,21.2)                 | 24.1(23.8,24,5)                 |
|               | <b>JD 30</b>     | 17.7(16.6,18.7)                 | 22.2(21.7,22,7)                 |
|               | <b>REC 5</b>     | 19.4(18.7,20.0)                 | 24.8(24.2,25.5)                 |
|               | <b>END</b>       | 18.0(16.9,19.2)                 | 24.0(23.2,24.9)                 |
| <b>SEATED</b> |                  |                                 |                                 |
|               | <b>JD 5</b>      | 11.4(10.1,12.7)                 | 12.8(12.6,13.0)                 |
|               | <b>JD 10</b>     | 12.1(11.2,12.9)                 | 13.7(13.6,13.8)                 |
|               | <b>JD 15</b>     | 9.9(9.5,10.2)                   | 11.8(11.5,12.0)                 |
|               | <b>JD 20</b>     | 9.9(9.6,10.3)                   | 11.4(11.2,11.6)                 |
|               | <b>JD 25</b>     | 9.2(7.8,10.7)                   | 11.5(10.8,12.2)                 |
|               | <b>JD 30</b>     | 9.6(7.5,11.7)                   | 12.8(11.7,13.9)                 |
|               | <b>REC 5</b>     | 10.4(9.7,11.1)                  | 13.2(11.8,14.6)                 |
|               | <b>END</b>       | 15.6(15.2,16.2)                 | 20.8(19.9,21.7)                 |
